# Supplementary material for: Fin Whale (Balaenoptera physalus) Mortality along the Italian Coast between 1624 and 2021
Source: Animals (Basel). 2022 Nov 10;12(22):3111. doi: 10.3390/ani12223111 (PMC9686696; doi:10.3390/ani12223111)
Supplement: Supplementary file 1 [file animals-12-03111-s001.zip › Table S1.xlsx]

## Sheet: fin_whale_1624-2021
Index	Type	Year	Date	Season	Location	Latitude	Longitude	Ref.code	N_animals	Size (m)	Estimated(E) or measured(M)	Sex	Life stage	Death cause	Conservation status	Source	Notes
1	historical	1624	28/01/1624	Winter	Between Santa Marinella and Capo Linaro (Lazio)	42.0298	11.8376	NA	1	16.80	NA	U	adolescent/adult/old	stranding	NA	Maio et al., 2014
2	historical	1624	before 15 February 1624	Winter	Near the castle of Santa Severa (Lazio)	42.0235	11.9467	NA	1	20.20	NA	U	adolescent/adult/old	stranding	NA	Maio et al., 2014	Could be the same specimen of 28 January 1624
3	historical	NA	XVII Century	NA	Sorrento (Campania)	NA	NA	NA	1	17.5	NA	U	adolescent/adult/old	NA	NA	Maio et al., 2014
4	historical	1713	??/??/1713	NA	Populonia (Tuscany)	42.9909	10.4976	NA	1	NA	NA	U	NA	NA	NA
5	historical	1728	??/??/1728	NA	Gulf of Trieste (Friuli-Venezia Giulia)	45.6667	13.5833	NA	1	9.30	NA	U	fetus/calf/newborn	by-catch	NA	Lipej et al., 2004
6	historical	1827	05/05/1827	Spring	Andrano (Puglia)	39.9711	18.4074	NA	1	18	NA	M	adolescent/adult/old	stranding	NA	Maio, 2014
7	historical	1831	??/??/1831	NA	Muggia, Trieste (Friuli Venezia Giulia)	45.6047	13.7763	NA	1	14.5	NA	U	immature	stranding	NA		Skull at Museum of Monaco (?)
8	historical	1833	??/??/1833	NA	Civitavecchia (Lazio)	42.0867	11.7924	NA	1	NA	NA	U	NA	by-catch	NA
9	historical	1839	08/08/1839	Summer	Capo Sant Andrea, Elba Island (Tuscany)	42.8086	10.1408	NA	1	14.50	NA	M	immature	killing	NA		The animal stranded alive
10	historical	1844	10/11/1844	Autumn	Bordighera (Liguria)	43.7778	7.67562	NA	1	18.00	NA	U	adolescent/adult/old	stranding	NA		Museum of Turin
11	historical	1846	??/??/1846	NA	Capo Santa Panagia, Siracusa (Sicily)	37.1054	15.2853	NA	1	NA	NA	U	NA	killing	NA
12	historical	1852	??/??/1852	NA	Bordighera (Liguria)	43.7778	7.67562	NA	1	NA	NA	U	NA	stranding	NA
13	historical	1855	??/??/1855	NA	Alghero (Sardinia)	40.5556	8.31524	NA	1	19.30	NA	U	adolescent/adult/old	killing	NA
14	historical	1857	30/07/1857	Summer	Portoferraio, Elba Island (Tuscany)	42.8101	10.3202	NA	1	21.00	NA	U	adolescent/adult/old	stranding	NA
15	historical	1860	??/??/1860	NA	Mondello, Palermo (Sicily)	38.2021	13.3278	NA	1	6.50	NA	U	fetus/calf/newborn	stranding	NA
16	historical	1863	01/10/1863	Autumn	Sestri Levante (Liguria)	44.2731	9.39542	NA	1	21.50	NA	U	adolescent/adult/old	killing	NA
17	historical	1866	04/03/1866	Spring	Selciatella, between Ponte (Foce) di Rio Fiume and the castle of Santa Marinella (Lazio)	42.0393	11.8874	NA	1	18.00	NA	F	adolescent/adult/old	stranding	NA	Maio et al., 2014	Skeleton, Museum of Comparative Anatomy of Rome
18	historical	1868	??/??/1868	NA	Off Genova (Liguria)	NA	NA	NA	1	NA	NA	U	NA	killing	NA
19	historical	1871	10/06/1871	Summer	Seno delle Corazze (Tuscany)	43.5091	10.3211	NA	1	8.00	NA	F	fetus/calf/newborn	stranding	NA
20	historical	1872	05/05/1872	Spring	Marina di Andrano (Puglia)	39.9697	18.4061	NA	1	15.75	NA	U	adolescent/adult/old	stranding	NA
21	historical	1872	08/11/1872	Autumn	Diano Marina (Liguria)	43.9082	8.08472	NA	1	NA	NA	U	NA	killing	NA
22	historical	1875	??/??/1875	NA	??, Calabria	NA	NA	NA	1	NA	NA	U	NA	NA	NA
23	historical	1878	01/10/1878	Autumn	Monterosso (Liguria)	44.1312	9.63762	NA	2	18.00	NA	1F, 1 U	adolescent/adult/old	floating carcass	NA		Museum of Natural History of Genova
24	historical	1889	01/07/1889	Summer	Piombino (Tuscany)	NA	NA	NA	2	17.17	NA	U	adolescent/adult/old	NA	NA
25	historical	1894	20/09/1894	Autumn	Near the harbour of Gallipoli (Puglia)	40.0537	17.9808	NA	1	13.00	NA	U	immature	killing	NA
26	historical	1896	14/09/1896	Autumn	8 NM off South of Capo Vado (Liguria)	44.2587	8.45228	NA	1	18.00	NA	F	adolescent/adult/old	floating carcass	NA
27	historical	1896	18/10/1896	Autumn	15 NM off South of the Genova Harbour (Liguria)	44.2286	8.93482	NA	1	21.00	NA	F	adolescent/adult/old	floating carcass	NA
28	historical	1896	23/10/1896	Autumn	Framura (Liguria)	44.2026	9.54733	NA	1	14.00	NA	M	immature	floating carcass	NA
29	historical	1896	18/12/1896	Winter	Cagliari (Sardinia)	39.1396	9.60561	NA	2	NA	NA	U	NA	floating carcass	NA
30	historical	1896	??/??/1896	NA	Between Pietra Ligure and Borgio (Liguria)	44.1569	8.30172	NA	1	18.00	NA	M	adolescent/adult/old	floating carcass	NA		Museum of Turin
31	historical	1897	08/01/1897	Winter	Capo Spartivento (Calabria)	37.9202	16.0653	NA	1	NA	NA	U	NA	ship strike	NA
32	historical	1897	31/08/1897	Summer	Island of La Maddalena (Sardinia)	41.2114	9.40635	NA	1	15.30	NA	U	immature	stranding	NA
33	historical	1897	01/09/1897	Autumn	Marina di Carrara (Tuscany)	44.031	10.0444	NA	1	NA	NA	U	NA	stranding	NA
34	historical	1898	end of May 1898	Spring	Fogliano (Lazio)	41.3924	12.8966	NA	1	10.70	NA	U	immature	stranding	NA	Maio et al., 2014	Erroneously reported as Sperm Whale
35	historical	1898	02/06/1898	Summer	Stintino (Sardinia)	40.8618	8.29178	NA	1	18.00	NA	U	adolescent/adult/old	stranding	NA
36	historical	1898	02/06/1898	Summer	Island of La Maddalena (Sardinia)	41.2498	9.41367	NA	1	18.00	NA	U	adolescent/adult/old	stranding	NA
37	historical	1898	between 1 and 15 June 1898	Spring	Porto Ferraio, Elba Island (Tuscany)	42.8101	10.3202	NA	1	15.00	NA	U	immature	stranding	NA
38	historical	1898	08/12/1898	Winter	Porto Torres (Sardinia)	40.8622	8.39773	NA	1	9.00	NA	U	fetus/calf/newborn	stranding	NA
39	historical	1900	1900-03-28	Spring	Carloforte (Sardinia)	39.1764	8.31109	NA	1	10.50	NA	U	immature	stranding	NA
40	historical	1901	1901-09-07	Autumn	Marzocco (Tuscany)	43.5639	10.3046	NA	1	18.00	NA	F	adolescent/adult/old	killing	NA	Museum of Calci
41	historical	1902	1902-01-01	Winter	Nearby the scogliera di Vallesante, Levanto (Liguria)	44.1728	9.60104	NA	1	12.00	NA	F	immature	floating carcass	NA
42	historical	1903	1903-05-09	Spring	Cabras (Sardinia)	39.8951	8.42272	NA	1	17.20	NA	M	adolescent/adult/old	stranding	NA
43	historical	1903	1903-08-06	Summer	Capo Mele (Liguria)	43.9651	8.18418	NA	1	19.30	NA	M	adolescent/adult/old	killing	NA
44	historical	1907	1907-06-20	Summer	San Vincenzo (Tuscany)	43.1041	10.5412	NA	1	11.50	NA	F	immature	stranding	NA
45	historical	1907	1907-12-17	Winter	Castellammare (Sicily)	38.027	12.8889	NA	1	5.50	NA	M	fetus/calf/newborn	killing	NA	De Gregorio, 1910
46	historical	1908	1908-09-05	Autumn	Marina di Massa (Tuscany)	44.0068	10.0999	NA	1	18.30	NA	U	adolescent/adult/old	stranding	NA
47	historical	1908	1908-10-04	Autumn	Sturla (Liguria)	44.3903	8.9814	NA	1	20.00	NA	U	adolescent/adult/old	killing	NA
48	historical	1908	??/??/1908	NA	Corniglia (Liguria)	44.119	9.70868	NA	1	NA	NA	U	NA	NA	NA	Cagnolaro et al., 2014
49	historical	1911	1911-12-15	Winter	Castel Fusano (Lazio)	41.718	12.309	NA	1	5.75	NA	U	fetus/calf/newborn	stranding	Alive	Vomero et al., 2014	Skull at ex MCZ Rome
50	historical	1915	1915-12-27	Winter	Marina di Pisa (Tuscany)	43.6247	10.2962	NA	1	NA	NA	U	NA	NA	NA		Body parts only
51	historical	1916	1916-12-13	Winter	Portovecchio (Tuscany)	42.9152	10.5444	NA	1	7.40	NA	U	fetus/calf/newborn	killing	NA
52	historical	1926	1926-07-22	Summer	Portoferraio (Tuscany)	42.8068	10.3282	NA	1	11.30	NA	F	immature	killing	NA
53	historical	1928	1928-11-08	Autumn	San Giovanni a Teduccio (Campania)	40.8394	14.2952	NA	1	17.00	NA	U	adolescent/adult/old	stranding	NA
54	historical	1932	??/??/1932	NA	Elba Island (Tuscany)	42.8068	10.2546	NA	1	13.00	NA	U	immature	stranding	NA
55	historical	1933	1933-12-17	Winter	Cala D'Oliva, Asinara Island (Sardinia)	41.0801	8.33447	NA	1	16.90	NA	U	adolescent/adult/old	stranding	NA
56	historical	1935	1935-01-03	Winter	Stintino (Sardinia)	40.9375	8.23073	NA	1	14.00	NA	M	immature	stranding	NA
57	historical	1949	1949-11-14	Autumn	Località Chiapparo, Punta Rondinella (Puglia)	40.4801	17.1779	NA	1	15.00	NA	U	immature	killing	NA
58	historical	1953	1953-02-10	Winter	Beach of Gromola by the delta of Sele River (Campania)	40.6337	14.8307	NA	1	14.00	NA	M	immature	stranding	NA
59	historical	1953	1953-11-16	Autumn	Beach of Maronti, Ischia Island (Campania)	40.6999	13.9157	NA	1	6.25	NA	M	fetus/calf/newborn	killing	Alive		The animal stranded alive
60	historical	1955	1955-06-09	Summer	La Spezia (Liguria)	44.1034	9.83924	NA	1	10.60	NA	F	immature	stranding	NA
61	historical	1957	1957-01-01	Winter	Cala del Fortino di Frontone, Island of Ponza (Lazio)	40.9145	12.9657	NA	1	20.00	NA	M	adolescent/adult/old	stranding	NA
62	historical	1960	1960-08-16	Summer	Vallevò (Abruzzo)	42.2876	14.4811	NA	1	19.95	NA	M	adolescent/adult/old	killing	NA	Pierantonio, Bearzi, 2012
63	historical	1962	1962-07-01	Summer	Paestum (Campania)	40.419	14.9843	NA	1	19.00	NA	U	adolescent/adult/old	stranding	NA	Di Natale and Cagnolaro pers. comm.
64	historical	1963	1963-12-27	Winter	Bellavista, Taranto (Puglia)	40.509	17.1443	NA	1	NA	NA	U	NA	stranding	NA
65	modern	1964	March 1964	Spring	Southern Ionian Sea	NA	NA	NA	1	3.00	E	U	fetus/calf/newborn	NA	NA	Di Natale and Cagnolaro personal communication
66	modern	1973	1973-04-01	Spring	Gulf of Genova (Liguria)	NA	NA	MSNVRCO455	1	17.25	M	M	adolescent/adult/old	ship strike	fresh	Panigada et al., 2006
67	modern	1973	October 1973	Autumn	Porto Torres (Sardinia)	40.8338	8.40837	NA	1	12.00	E	U	immature	by-catch	NA	Di Natale and Cagnolaro pers. comm.
68	modern	1974	1974-11-23	Autumn	Pontedoro (Tuscany)	43.7486	10.3349	Mam357a	1	16.12	E	M	adolescent/adult/old	NA	NA
69	modern	1976	1976-01-24	Winter	Zappulla, Messina (Sicily)	38.1138	14.6989	NA	1	18.80	E	U	adolescent/adult/old	ship strike	NA	Di Natale and Giuffrè, 1976; Panigada et al., 2006
70	modern	1976	1976-06-23	Summer	Trieste (Friuli-Venezia Giulia)	45.6528	13.7616	NA	1	10	E	F	fetus/calf/newborn	NA	alive/dead	Pierantonio, Bearzi, 2012
71	modern	1977	1977-01-01	Winter	Gulf of Genova (Liguria)	NA	NA	MSNG 46802/a,b	1	12.90	M	M	immature	ship strike	fresh	Poggi, 1982
72	modern	1977	June 1977	Summer	Torre Canne (Puglia)	40.8376	17.4691	NA	1	12.00	E	F	immature	NA	NA	Di Natale and Cagnolaro pers. comm.
73	modern	1979	1979-02-18	Winter	Argentario (Tuscany)	42.3765	11.1283	NA	1	18.00	E	U	adolescent/adult/old	NA	NA	Di Natale and Cagnolaro pers. comm.
74	modern	1981	1981-09-18	Autumn	Island of Gigllio (Tuscany)	42.37	10.9191	MSNM Ma4880	1	5.90	M	M	fetus/calf/newborn	NA	NA	Cagnolaro et al., 1986
75	modern	1982	1982-11-11	Autumn	Island of Gigllio (Tuscany)	42.37	10.9191	MSNM Ma4881	1	5.45	M	M	fetus/calf/newborn	NA	NA	Cagnolaro et al., 1986; Cozzi et al., 2012
76	modern	1983	1983-12-11	Winter	Gizzeria Lido (Calabria)	38.9285	16.2132	NA	1	5.50	E	F	fetus/calf/newborn	NA	NA	Di Natale and Cagnolaro pers. comm.
77	modern	1984	1984-03-13	Spring	Ligurian Sea, (Liguria)	40.8459	8.39807	0	1	15.00	M	F	immature	ship strike	fresh
78	modern	1986	1986-04-22	Spring	Baratti (Tuscany)	42.9992	10.516	Mam358	1	NA	E	U	NA	NA	NA		Bones
79	modern	1986	1986-05-23	Spring	Lido delle Nazioni (Emilia-Romagna)	44.7462	12.2468	3667	1	7.00	E	U	fetus/calf/newborn	NA	alive/dead	Centro Studi Cetacei (CSC), 1987
80	modern	1986	1986-06-23	Summer	Castello Sonnino (Tuscany)	43.4628	10.3552	4	1	11.50	E	M	immature	ship strike	NA	Centro Studi Cetacei, 1987
81	modern	1986	1986-06-28	Summer	9 MN South-East of Gorgona Island (Tuscany)	43.3143	10.2124	NA	1	14.00	E	U	immature	ship strike	NA	Centro Studi Cetacei, 1987
82	modern	1986	1986-09-20	Autumn	Pizzo Calabro (Calabria)	38.7333	16.1667	3667	1	9.31	M	F	fetus/calf/newborn	NA	NA	Centro Studi Cetacei, 1987
83	modern	1987	1987-01-21	Winter	Camping La Torraccia, Gulf of Baratti (Tuscany)	42.9991	10.5171	52	1	18	E	U	adolescent/adult/old	NA	advanced decomp.	Centro Studi Cetacei, 1988
84	modern	1987	1987-04-20	Spring	Capo Malfatano (Sardinia)	38.8872	8.80597	112	1	8	E	U	fetus/calf/newborn	NA	NA	Centro Studi Cetacei, 1988	Without tail
85	modern	1987	1987-05-22	Spring	Olbia (Sardinia)	40.921	9.52806	130	1	12.95	E	F	immature	ship strike	NA	Centro Studi Cetacei, 1988; Panigada et al., 2006
86	modern	1987	1987-07-02	Summer	Harbour of Messina, Messina (Sicily)	38.2024	15.5742	NA	1	22.00	E	F	adolescent/adult/old	NA	alive/dead	Centro Studi Cetacei, 1988
87	modern	1987	1987-07-14	Summer	Capo St. Elia (Sardinia)	39.1951	9.16571	165	1	8.00	E	U	fetus/calf/newborn	NA	advanced decomp.	Centro Studi Cetacei, 1988
88	modern	1988	March 1988	Spring	Gallipoli (Puglia)	40.0537	17.9808	NA	1	NA	E	U	NA	NA	NA
89	modern	1989	1989-04-10	Spring	Gaeta (Lazio)	41.0015	13.133	1953	1	16.80	E	F	adolescent/adult/old	NA	advanced decomp.	Centro Studi Cetacei, 1991	Floating carcass
90	modern	1989	1989-05-20	Spring	Harbour of Olbia (Sardinia)	40.9223	9.56856	1966	1	12.00	E	F	immature	ship strike	NA	Centro Studi Cetacei, 1991
91	modern	1989	1989-08-30	Summer	Marina di Curinga (Calabria)	38.8386	16.2207	2074	1	7.50	E	U	fetus/calf/newborn	NA	advanced decomp.	Centro Studi Cetacei, 1991
92	modern	1989	1989-10-15	Autumn	26 km off Sanremo (Liguria)	43.7242	7.80586	2103	1	NA	NA	U	NA	NA	NA	Centro Studi Cetacei, 1991; Notarbartolo di Sciara et al., 2003
93	modern	1990	1990-02-15	Winter	Fuscaldo (Calabria)	39.4116	16.0158	443	1	13.00	E	U	immature	NA	advanced decomp.	Centro Studi Cetacei, 1992
94	modern	1990	1990-03-10	Spring	Gulf of La Spezia (Liguria)	44.1034	9.83924	448	1	12.00	E	U	immature	NA	advanced decomp.	Centro Studi Cetacei, 1992	Floating carcass
95	modern	1990	1990-04-28	Spring	1.5 NM off Porto Torres (Sardinia)	40.8338	8.40837	468	1	16.00	E	M	adolescent/adult/old	ship strike	alive/dead	Centro Studi Cetacei, 1992; Panigada et al., 2006	Whale found alive, propeller cuts on the back
96	modern	1990	1990-07-13	Summer	Tonnara di Palmi (Calabria)	38.4191	15.8775	497	1	15.00	M	U	immature	by-catch/entanglement	advanced decomp.	Centro Studi Cetacei, 1992
97	modern	1990	1990-07-16	Summer	Cervia (Emilia-Romagna)	44.2644	12.3632	498	1	12.00	M	F	immature	NA	advanced decomp.	Benvenuti et al., 1991; Centro Studi Cetacei, 1992; Bortolotto, 2014
98	modern	1990	1990-10-15	Autumn	Calambrone (Tuscany)	43.5996	10.2936	565	1	19.00	M	F	adolescent/adult/old	NA	alive/dead	Nicolosi et al., 1997; Barsotti et al., 1995; Centro Studi Cetacei, 1992
99	modern	1991	1991-01-27	Winter	Island of Razzoli, La Maddalena (Sardinia)	41.3019	9.34807	644	1	NA	NA	U	NA	NA	advanced decomp.	Centro Studi Cetacei, 1994
100	modern	1991	1991-04-30	Spring	Harbour of Genova (Liguria)	44.3986	8.96597	706	1	17.65	M	M	adolescent/adult/old	ship strike	alive/dead	Centro Studi Cetacei, 1994
101	modern	1991	1991-08-03	Summer	Carovigno (Puglia)	40.7541	17.7275	839	1	16.00	E	F	adolescent/adult/old	NA	NA	Centro Studi Cetacei, 1994
102	modern	1992	1992-11-22	Autumn	Marina di Pisa (Tuscany)	43.6727	10.2738	1308	1	5.92	E	F	fetus/calf/newborn	NA	alive/dead	Centro Studi Cetacei, 1995
103	modern	1993	1993-03-03	Spring	Secca Grande, Ribera (Sicily)	37.4631	13.2214	1325	1	18.8	E	F	adolescent/adult/old	NA	advanced decomp.	Centro Studi Cetacei, 1996a
104	modern	1993	1993-03-30	Spring	Porto Torres (Sardinia)	40.8356	8.40866	1332	1	15.00	M	F	immature	ship strike	fresh	Centro Studi Cetacei, 1996a
105	modern	1994	1994-03-02	Spring	Gutturu e Flumini (Sardinia)	39.6002	8.4717	1461	1	6.00	E	U	fetus/calf/newborn	NA	advanced decomp.	Centro Studi Cetacei, 1996b	Without head and tail
106	modern	1994	1994-03-21	Spring	Secche della Meloria (Tuscany)	43.5557	10.2413	MSNFI18935	1	NA	NA	M	NA	NA	advanced decomp.	Centro Studi Cetacei, 1996(?)
107	modern	1994	1994-05-20	Spring	Nora (Sardinia)	38.9839	9.01676	1483	1	13.00	M	M	immature	ship strike	NA	Centro Studi Cetacei, 1996b
108	modern	1995	1995-05-25	Spring	Harbour of Livorno (Tuscany)	43.5504	10.3059	1597	1	15.15	M	M	adolescent/adult/old	ship strike	fresh	Centro Studi Cetacei, 1997a
109	modern	1995	1995-09-23	Autumn	Livorno (Tuscany)	43.5261	10.1562	1651	1	12.80	M	M	immature	NA	NA	Centro Studi Cetacei, 1997a	Floating carcass
110	modern	1995	1995-12-12	Winter	Funtana Meiga, Cabras (Sardinia)	39.8967	8.42306	1656	1	6.00	M	U	fetus/calf/newborn	NA	fresh	Centro Studi Cetacei, 1997a
111	modern	1996	1996-02-03	Winter	Palmi (Calabria)	38.3576	15.8465	2124	1	6.60	M	F	fetus/calf/newborn	NA	advanced decomp.	Centro Studi Cetacei, 1997b
112	modern	1996	1996-03-21	Spring	Secche della Meloria (Tuscany)	43.5557	10.2413	2125	1	8.00	M	M	fetus/calf/newborn	NA	advanced decomp.	Centro Studi Cetacei, 1997b
113	modern	1996	1996-05-12	Spring	Lido di Licola, Giuliano (Campania)	40.8799	14.0418	2127	1	17.00	E	U	adolescent/adult/old	NA	advanced decomp.	Centro Studi Cetacei, 1997b
114	modern	1997	1997-07-26	Summer	Gaeta (Lazio)	41.2107	13.5714	1856	1	15.00	E	U	immature	NA	advanced decomp.	Centro Studi Cetacei, 1998
115	modern	1997	1997-09-25	Autumn	Stintino (Sardinia)	40.9375	8.23073	1893	1	15.00	E	U	immature	by-catch/entanglement	NA	Centro Studi Cetacei, 1998
116	modern	1997	1997-10-12	Autumn	Genova (Liguria)	44.3986	8.96597	1899	1	12.70	M	M	immature	NA	advanced decomp.	Centro Studi Cetacei, 1998	Floating carcass
117	modern	1997	1997-10-14	Autumn	Is Arenas (Sardinia)	40.0658	8.4803	1901	1	15.00	E	U	immature	NA	NA	Centro Studi Cetacei, 1998	Without tail
118	modern	1997	1997-12-11	Winter	Island of Procida (Campania)	40.7555	14.0159	1911	1	14.00	M	U	immature	NA	advanced decomp.	Centro Studi Cetacei, 1998
119	modern	1998	1998-01-27	Winter	Oristano (Sardinia)	39.8681	8.57713	3743	1	17.00	E	F	adolescent/adult/old	NA	advanced decomp.	Centro Studi Cetacei, 2000	Without tail
120	modern	1998	1998-02-07	Winter	Darsena Toscana (Tuscany)	43.5728	10.2997	3744	1	13.80	M	M	immature	ship strike	NA	Centro Studi Cetacei, 2000
121	modern	1998	1998-05-19	Spring	Torre a Mare (Puglia)	41.0894	16.9972	3745	1	20.00	E	U	adolescent/adult/old	NA	advanced decomp.	Centro Studi Cetacei, 2000
122	modern	1998	1998-12-26	Winter	Gioia Tauro (Calabria)	38.4342	15.8986	3746	1	18.00	E	U	adolescent/adult/old	NA	advanced decomp.	Centro Studi Cetacei, 2000
123	modern	1999	1999-07-11	Summer	Piombino (Tuscany)	42.9072	10.5277	9628	1	NA	NA	U	NA	NA	advanced decomp.	Centro Studi Cetacei, 2001	Floating carcass
124	modern	1999	1999-08-15	Summer	Off Savona (Liguria)	44.2798	8.49245	9629	1	12.00	E	U	immature	NA	advanced decomp.	Centro Studi Cetacei, 2001	Floating carcass
125	modern	2000	2000-02-21	Winter	S.Vito Lo Capo (Sicily)	38.1795	12.7429	9630	1	14.00	E	U	immature	NA	advanced decomp.	Centro Studi Cetacei, 2002	Without tail
126	modern	2000	2000-11-07	Autumn	Morcone, Elba (Tuscany)	42.7322	10.3744	9631	1	4.10	M	F	fetus/calf/newborn	Biological	fresh	Centro Studi Cetacei, 2002
127	modern	2000	2000-11-08	Autumn	Genova Quinto (Liguria)	44.3858	9.01752	9632	1	11.00	M	F	immature	NA	advanced decomp.	Centro Studi Cetacei, 2002
128	modern	2001	2001-04-06	Spring	Baia, Bacoli (Campania)	40.8123	14.0771	10064	1	2.75	E	U	fetus/calf/newborn	NA	advanced decomp.	SISN e MSNM 144 (I): 151-166, Giugno 2003	Partial body parts
129	modern	2011	2001-11-04	Autumn	Ficarazzi (Sicily)	38.0985	13.4711	10066	1	6.50	M	F	fetus/calf/newborn	NA	NA	SISN e MSNM 144 (I): 151-166, Giugno 2003
130	modern	2001	2001-11-04	Autumn	Favazzina (Calabria)	38.2536	15.7231	10065	1	13.00	M	F	immature	NA	advanced decomp.	SISN e MSNM 144 (I): 151-166, Giugno 2003
131	modern	2001	2001-12-06	Winter	Harbour of Genova (Liguria)	44.3967	8.91577	10067	1	13.50	M	F	immature	ship strike	fresh	SISN e MSNM 144 (I): 151-166, Giugno 2003
132	modern	2002	2002-02-21	Winter	San Vito Lo Capo (Sicily)	38.1884	12.735	NA	1	14.00	E	U	immature	NA	NA
133	modern	2002	2002-07-01	Summer	Vado Ligure (Liguria)	44.2692	8.43979	10609	1	15.00	M	M	immature	ship strike	advanced decomp.	SISN e MSNM 145 (I): 155-169, Giugno 2004
134	modern	2002	2002-09-09	Autumn	Pacì (Calabria)	38.2504	15.7022	10610	1	10.00	M	U	immature	NA	advanced decomp.	SISN e MSNM 145 (I): 155-169, Giugno 2004
135	modern	2002	2002-10-12	Autumn	Contrada Pisciotto, Licata (Sicily)	37.1199	13.8597	10611	1	9.90	M	F	fetus/calf/newborn	NA	fresh	SISN e MSNM 145 (I): 155-169, Giugno 2004
136	modern	2003	2003-01-26	Winter	Capo Frasca (Sardinia)	39.7606	8.46803	10504	1	6.00	E	U	fetus/calf/newborn	NA	advanced decomp.	Cetacei spiaggiati lungo le coste italiane. XVIII. Rendiconto 2003. (Mammalia), anno 2004. Atti Soc. it. Sci. nat. Museo civ. Stor. nat. Milano, 145 (II) 425-437
137	modern	2003	2003-11-03	Autumn	Villa Lessona (Lazio)	42.0306	11.8906	10505	1	6.00	E	U	fetus/calf/newborn	NA	NA	Cetacei spiaggiati lungo le coste italiane. XVIII. Rendiconto 2003. (Mammalia), anno 2004. Atti Soc. it. Sci. nat. Museo civ. Stor. nat. Milano, 145 (II) 425-437
138	modern	2004	2004-07-19	Summer	21 NM East of Capo Mele (Liguria)	43.9356	8.66667	10440	1	15.00	E	F	immature	NA	advanced decomp.	Cetacei spiaggiati lungo le coste italiane. XIX. Rendiconto 2004. (Mammalia), anno 2006. Atti Soc. it. Sci. nat Museo civ. Stor. nat. Milano, 147 (I) 145-157	Floating carcass
139	modern	2004	2004-07-21	Summer	15 NM South-West of Imperia (Liguria)	43.6836	7.90139	10441	1	2.70	E	F	fetus/calf/newborn	Biological	NA	Cetacei spiaggiati lungo le coste italiane. XIX. Rendiconto 2004. (Mammalia), anno 2006. Atti Soc. it. Sci. nat Museo civ. Stor. nat. Milano, 147 (I) 145-157 - Cozzi et al., 2012; Podestà et al., 2005b
140	modern	2005	2005-03-24	Spring	Harbour of Genova (Liguria)	44.3967	8.91577	10305	1	11.30	M	M	immature	ship strike	NA	Cetacei spiaggiati lungo le coste italiane. XX. Rendiconto 2005. Mammalia, anno 2006. Atti Soc. it. Sci. nat. Museo civ. Stor. nat. Milano, 147 (II) 325-335
141	modern	2005	2005-09-14	Autumn	Harbour of Genova (Liguria)	44.3967	8.91577	10362	1	6.00	M	F	fetus/calf/newborn	ship strike	NA	Cetacei spiaggiati lungo le coste italiane. XX. Rendiconto 2005. Mammalia, anno 2006. Atti Soc. it. Sci. nat. Museo civ. Stor. nat. Milano, 147 (II) 325-335
142	modern	2005	2005-10-15	Autumn	Harbour of Livorno (Tuscany)	43.5504	10.3059	10368	1	20.00	E	F	adolescent/adult/old	ship strike	NA	Cetacei spiaggiati lungo le coste italiane. XX. Rendiconto 2005. Mammalia, anno 2006. Atti Soc. it. Sci. nat. Museo civ. Stor. nat. Milano, 147 (II) 325-335
143	modern	2006	2006-10-24	Autumn	Alassio (Liguria)	44.16	8.35252	10789	1	5.57	M	M	fetus/calf/newborn	NA	advanced decomp.	CSC, data not published
144	modern	2006	2006-12-15	Winter	Punta su turrioni, Stintino (Sardinia)	40.9043	8.20353	11849	1	NA	NA	U	NA	NA	NA	From database
145	modern	2007	2007-06-22	Summer	Camogli (Ligura)	44.3423	9.15435	10879	1	8.20	M	F	fetus/calf/newborn	NA	advanced decomp.	From database
146	modern	2007	2007-07-01	Summer	Capo Conca (Campania)	40.6145	14.5686	10878	1	13.50	M	F	immature	ship strike	fresh	XXI. Rendiconto 2006-2010 CSC online publications, work n. 129: 1-23; Maio et al., 2012 Atti SISN MI
147	modern	2007	2007-07-15	Summer	6 MN off Capri Island (Campania)	40.5362	14.2074	10877	1	13.30	M	M	immature	NA	advanced decomp.	XXI. Rendiconto 2006-2010 CSC online publications, work n. 129: 1-23; Maio et al., 2012 Atti SISN MI	Floating carcass, it could be the same specimen of 01/07/2007
148	modern	2007	2007-07-21	Summer	10 NM off coast (Campania)	40.0333	15.2668	10876	1	13.00	E	F	immature	NA	advanced decomp.	XXI. Rendiconto 2006-2010 CSC online publications, work n. 129: 1-23; Maio et al., 2012 Atti SISN MI	Floating carcass
149	modern	2007	2007-11-20	Autumn	Sirolo (Marche)	43.519	13.6241	10847	1	17.50	M	F	adolescent/adult/old	NA	advanced decomp.	Caputo and Giovannotti, 2009
150	modern	2008	2008-01-24	Winter	Harbour of Santo Stefano (Tuscany)	42.4397	11.1669	11049	1	10.40	M	M	immature	Biological	fresh	Gorelli et al. 2011
151	modern	2008	2008-12-07	Winter	Viareggio (Tuscany)	43.5504	10.3059	11131	1	7.00	E	F	fetus/calf/newborn	ship strike	advanced decomp.	From database
152	modern	2009	2009-10-20	Autumn	Off Monte Procida (Campania)	40.7902	14.0326	NA	1	NA	E	U	NA	NA	NA	From database	Floating carcass
153	modern	2010	2010-08-26	Summer	Specchiarica, Maruggio (Puglia)	40.303	17.6996	NA	1	NA	E	U	NA	NA	NA	From database
154	modern	2011	2011-01-25	Winter	1.1 NM off North of Morto River Delta (Tuscany)	42.675	11.0265	11316	1	16.70	M	M	adolescent/adult/old	Biological	fresh	From database
155	modern	2011	2011-06-11	Summer	Entrance of the harbour of Castelsardo (Sardinia)	40.9137	8.70859	11361	1	8.00	E	U	fetus/calf/newborn	NA	advanced decomp.	Pintore A., data not published
156	modern	2011	2011-10-03	Autumn	Capo Testa (Sardinia)	41.2337	9.15549	11418	1	10.78	M	F	immature	Biological	fresh	From database
157	modern	2011	2011-10-29	Autumn	Harbour of Savona (Liguria)	44.3115	8.49338	11373	1	11.60	M	M	immature	NA	advanced decomp.	From database
158	modern	2011	2011-12-13	Winter	Capo della Vita (Tuscany)	42.8667	10.4167	11457	1	15.00	E	M	immature	NA	advanced decomp.	From database
159	modern	2012	2012-05-18	Spring	Le Rocchette (Tuscany)	42.7747	10.7956	11454	1	15.00	E	U	immature	NA	advanced decomp.	From database
160	modern	2012	2012-08-24	Summer	Recco (Liguria)	44.3564	9.13467	11509	1	13.50	E	M	immature	NA	advanced decomp.	From database
161	modern	2013	2013-03-19	Spring	Scoglietto, Rosignano (Tuscany)	43.3895	10.4293	11687	1	16.40	M	F	adolescent/adult/old	NA	advanced decomp.	From database
162	modern	2013	2013-05-30	Spring	Rometta Marea (Sicily)	38.235	15.4068	11794	1	4.00	E	U	fetus/calf/newborn	Biological	advanced decomp.	From database
163	modern	2013	2013-07-12	Summer	Harbour of Civitavecchia (Lazio)	42.0928	11.78	11816	1	10.00	E	U	immature	ship strike	advanced decomp.	From database
164	modern	2013	2013-08-11	Summer	Caulonia Marina (Calabria)	38.3394	16.4678	11842	1	6.00	E	U	fetus/calf/newborn	NA	advanced decomp.	From database
165	modern	2013	2013-10-11	Autumn	Harbour of Marciana Marina, Elba Island (Tuscany)	42.8074	10.2005	11877	1	4.50	E	F	fetus/calf/newborn	Biological	fresh	From database
166	modern	2013	2013-11-09	Autumn	Tirrenia (Tuscany)	43.6343	10.2864	11885	1	10.00	E	U	immature	NA	advanced decomp.	From database
167	modern	2014	2014-09-17	Autumn	Triscina (Sicily)	37.5807	12.792	12065	1	12.00	E	U	immature	NA	advanced decomp.	From database
168	modern	2014	2014-11-19	Autumn	Torre San Giovanni (Puglia)	39.8864	18.107	12091	1	14.00	E	U	immature	NA	advanced decomp.	From database
169	modern	2015	2015-01-15	Winter	Lido di Camaiore (Tuscany)	43.8986	10.2176	12112	1	17.30	M	M	adolescent/adult/old	Biological	advanced decomp.	From database
170	modern	2017	2017-05-02	Spring	Monte Rugginosu (Sardinia)	40.8502	8.20732	12565	1	13.00	E	U	immature	NA	mummified, bones	From database
171	modern	2017	2017-11-15	Autumn	Marina di Sorso (Sardinia)	40.8249	8.532	12681	1	17.12	M	M	adolescent/adult/old	NA	advanced decomp.	From database
172	modern	2019	2019-01-19	Winter	Civitavecchia (Lazio)	42.0955	11.7882	12888	1	5.00	M	F	fetus/calf/newborn	ship strike	advanced decomp.	From database
173	modern	2019	2019-11-19	Autumn	Pontile area ex SIR, Lamezia Terme (Calabria)	38.8536	16.2212	13096	1	6.34	M	M	fetus/calf/newborn	NA	fresh	From database
174	modern	2020	2020-11-07	Autumn	Cala del Rio, Anacapri, Napoli (Campania)	40.5502	14.2023	13294	1	14.20	M	F	immature	NA	advanced decomp.	Fioravanti et al., 2022	Hybrid: B.p. (male) x B. musculus
175	modern	2021	2021-01-14	Winter	Harbour of Sorrento (Campania)	40.629	14.375	13332	1	19.77	M	F	adolescent/adult/old	Biological	alive/dead	From database
176	modern	2021	2021-09-02	Autumn	Albinia (Tuscany)	42.51	11.187	13481	1	12.00	E	U	immature	NA	advanced decomp.	From database
